# Supplementary material for: Catalytic depolymerization of alkali lignin in ionic liquids on Pt-supported La2O3–SO42−/ZrO2 catalysts
Source: Royal Society of Chemistry journal article supplement (doi:10.1039/c9se00682f), 2020-01-01
Supplement: c9se00682f1.pdf [file c9se00682f1.pdf]

## Supporting information

### **Catalytic depolymerization of alkali lignin in ionic liquid on Pt-supported $\text{La}_2\text{O}_3\text{-SO}_4^{2-}/\text{ZrO}_2$ catalysts**

Xiuhui Wang <sup>a</sup>, Yi Luo <sup>a</sup>, Moriko Qian <sup>b</sup>, Eika W. Qian <sup>a\*</sup>

<sup>a</sup> Graduate School of Bio-Applications and Systems Engineering, Tokyo University of Agriculture and Technology, Nakacho 2-24-16, Koganei, Tokyo 184-8588, Japan.

<sup>b</sup> Department of Biological System Engineering, Washington State University, Richland, Washington 99345-1671, United States.

\* Corresponding author.

E-mail address: [whqian@cc.tuat.ac.jp](mailto:whqian@cc.tuat.ac.jp) (E.W. Qian).

Tel/Fax: +81-42-388-7410

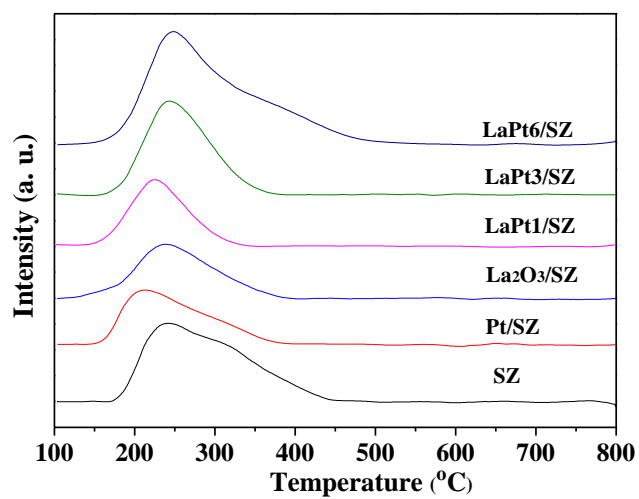

**Figure S1.** NH<sub>3</sub>-TPD profiles of the support and reduced catalysts.

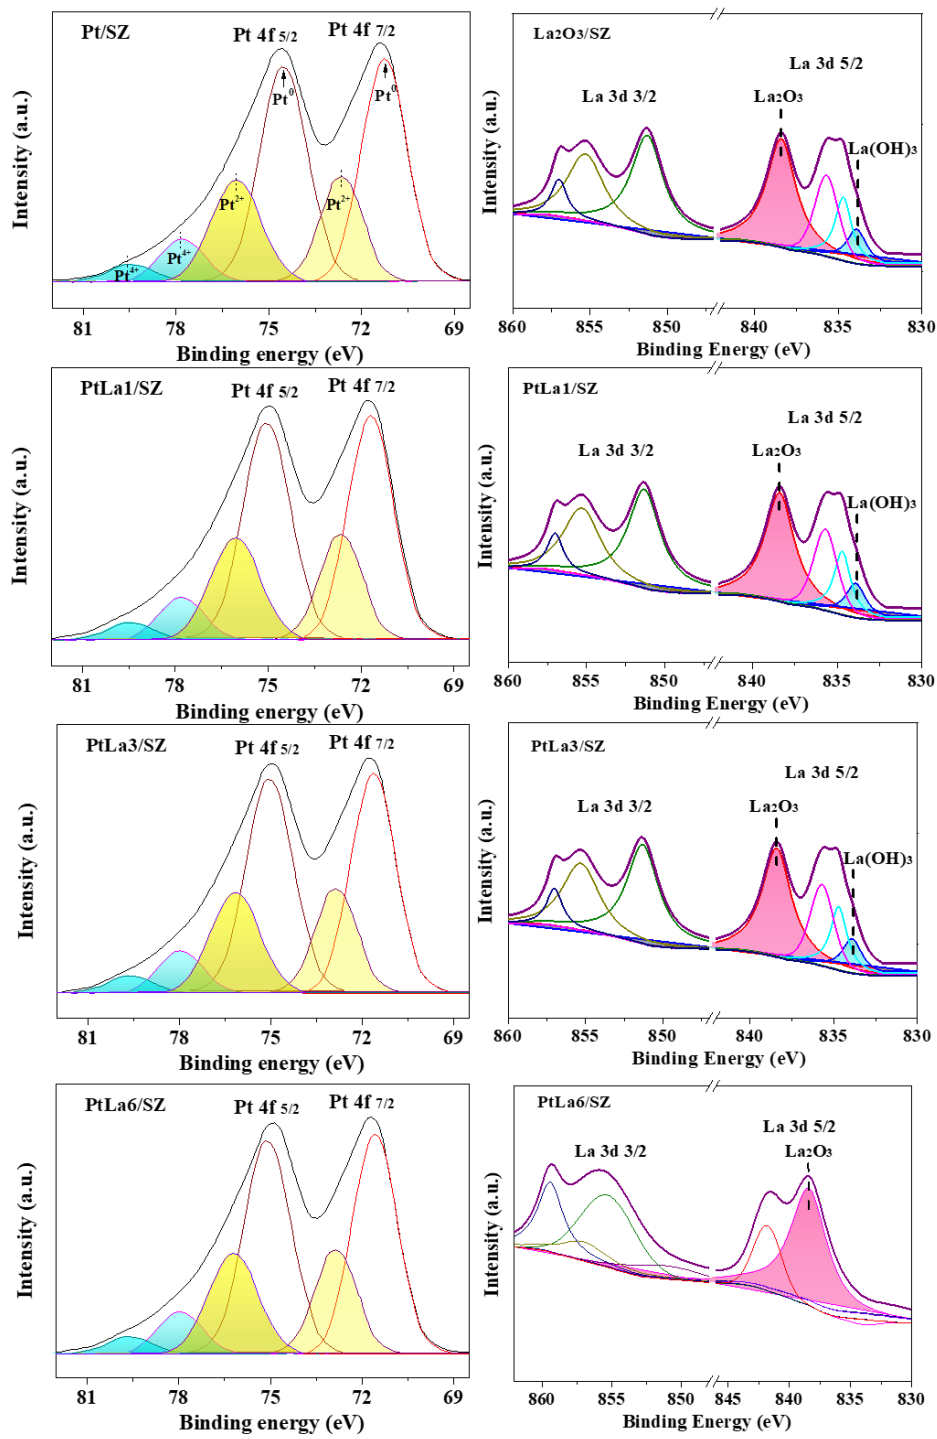

**Figure S2.** XPS spectra of Pt 4f X and La 3d for the reduced La<sub>2</sub>O<sub>3</sub>/SZ, Pt/SZ and PtLa<sub>y</sub>/SZ catalysts.

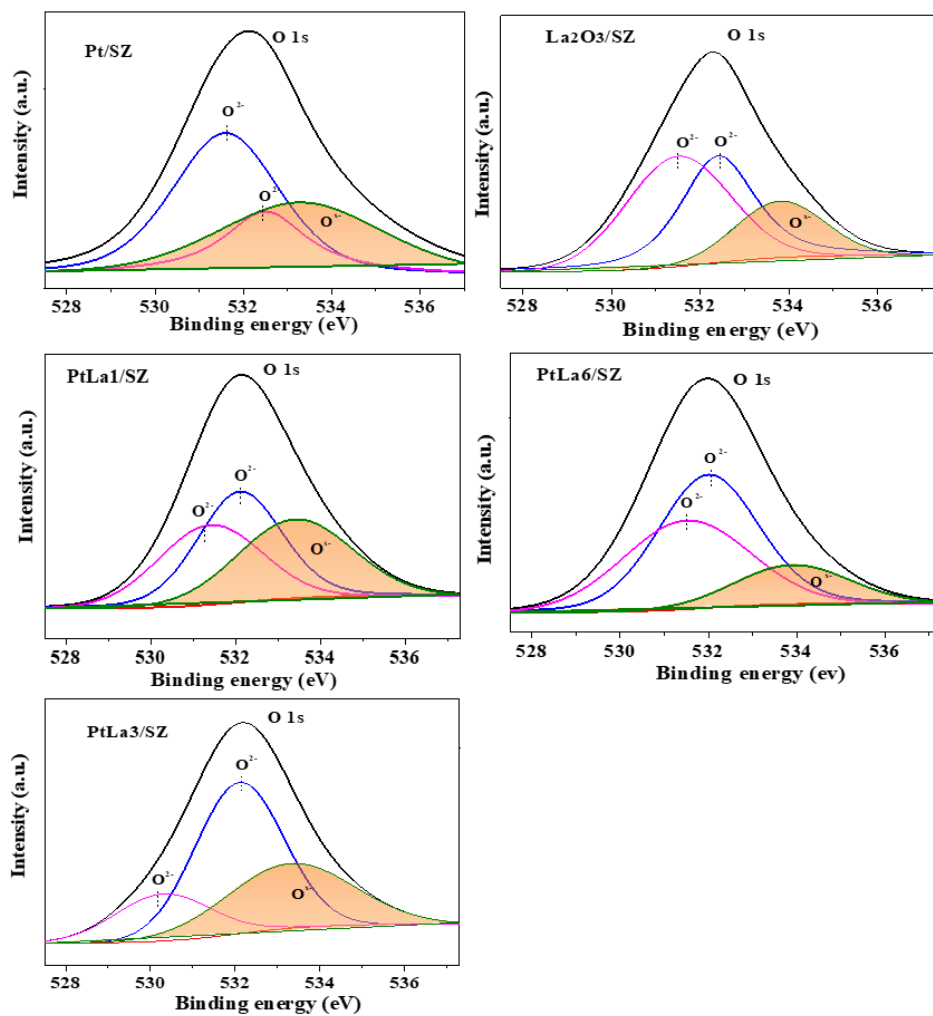

**Figure S3.** XPS spectra of O 1s for the reduced La<sub>2</sub>O<sub>3</sub>/SZ, Pt/SZ and PtLa <sub>$\gamma$</sub> /SZ catalysts.

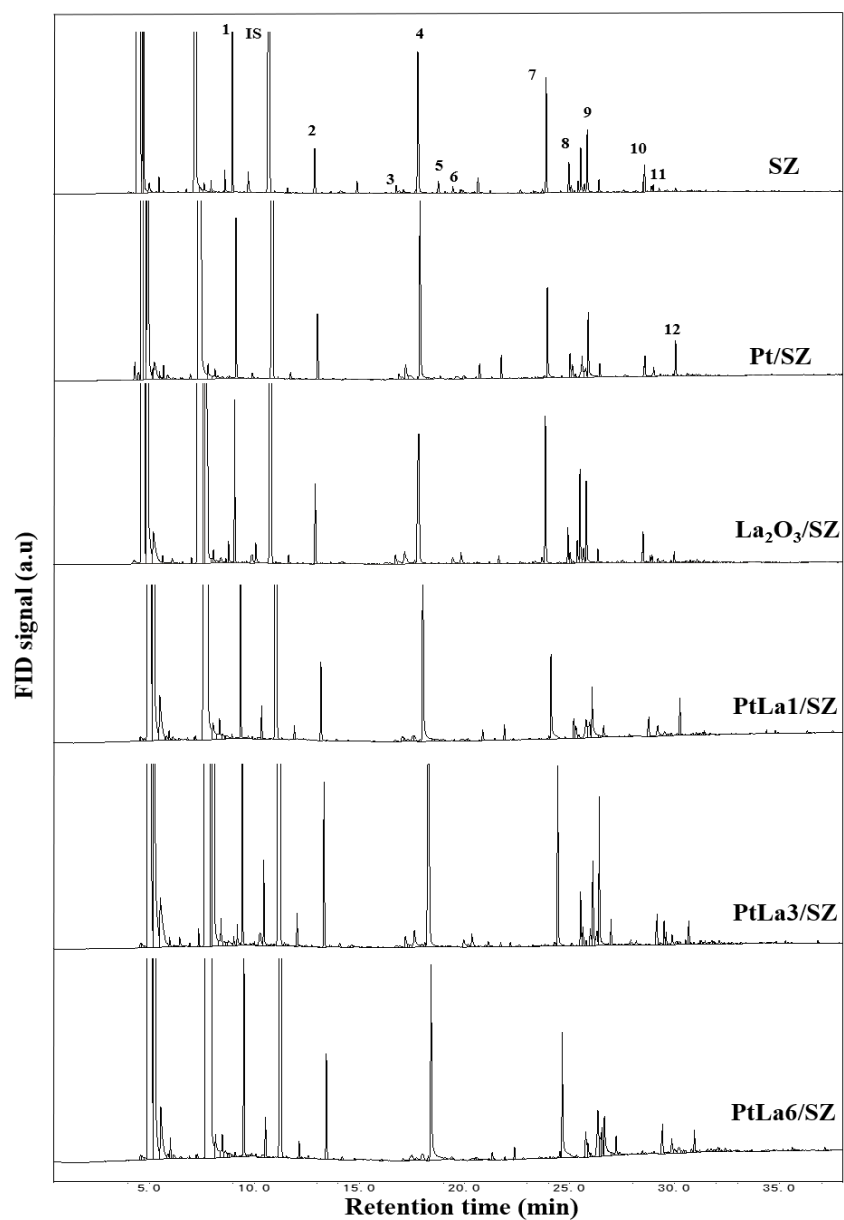

**Figure S4.** GC-FID chart of liquid products in lignin depolymerization with different catalysts (210 °C, WHSV of 3.8 h<sup>-1</sup>).

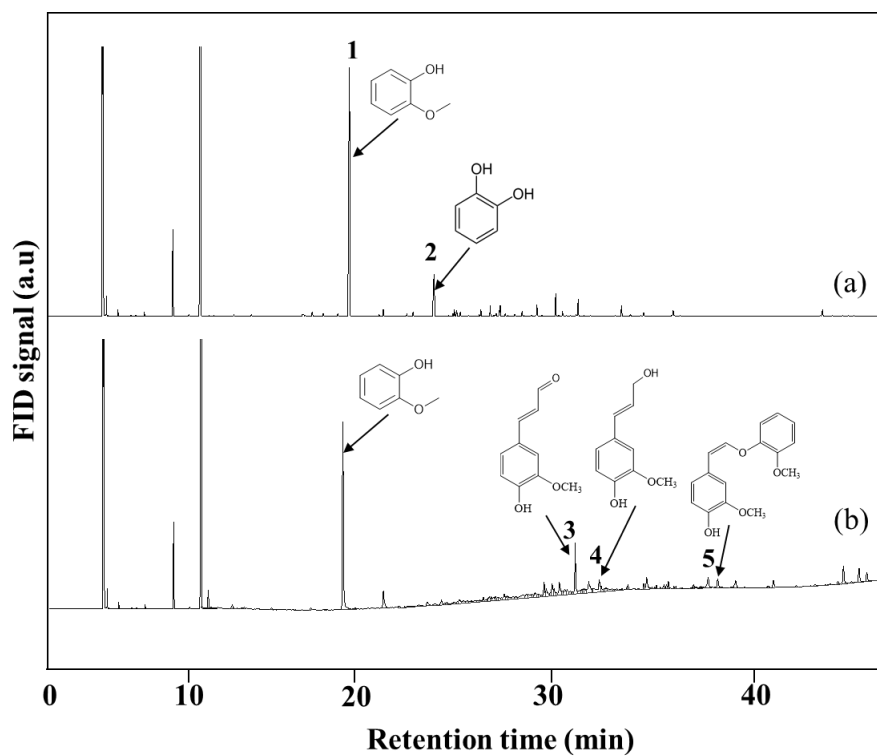

**Figure S5.** GC-FID chart of liquid products from pretreatment unit (90 °C, 3h), a: guaiacol; b: guaiacylglycerol- $\beta$ -guaiacyl ether (GG).

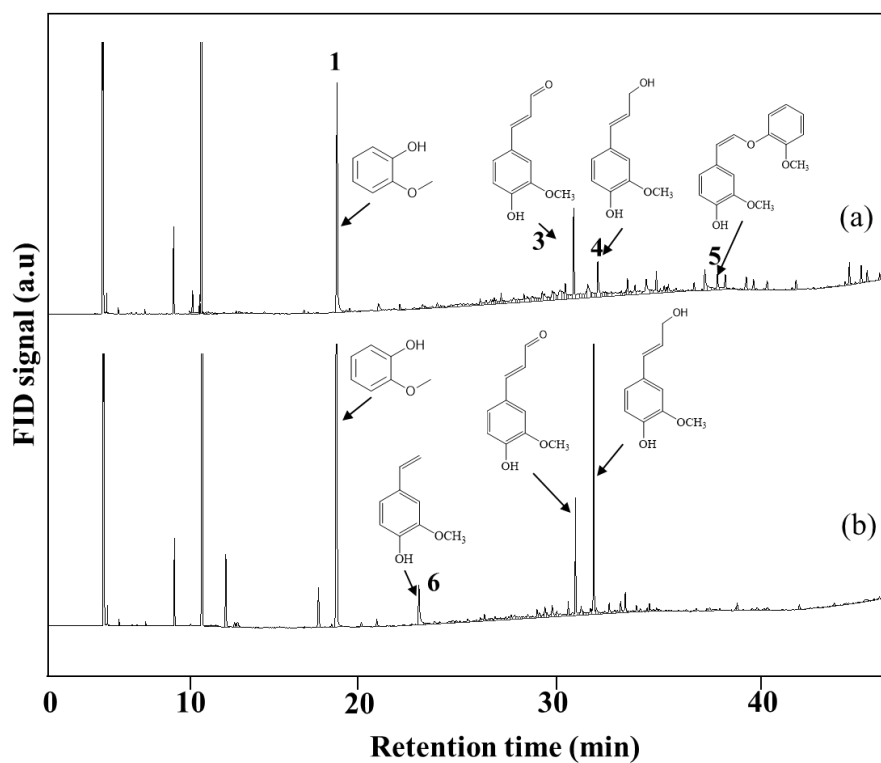

**Figure S6.** GC-FID chart of liquid products from guaiacylglycerol- $\beta$ -guaiacyl ether (GG) in reaction unit with different catalysts (210 °C; 1h; a: SZ catalyst; b: Pt/SZ catalyst).

**Table S1.** Identification of liquid products by means of GC-MS.

| No. | Compounds                                      | Structure                                                                             |
|-----|------------------------------------------------|---------------------------------------------------------------------------------------|
| 1   | Furfuryl alcohol                               | 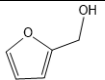   |
| 2   | Benzaldehyde                                   |    |
| 3   | 2,6-Xylenol                                    |    |
| 4   | 4-Vinylphenol                                  |    |
| 5   | Iso-cresol                                     |    |
| 6   | 6-Methylsalicylic acid ethyl ester             |    |
| 7   | 4-Hydroxyphenylacetic acid                     |  |
| 8   | 2,6-Dimethylstyrene                            |  |
| 9   | 1,5-Dihydroxy-1,2,3,4-tetrahydro naphthalene   |  |
| 10  | 2,2'-Biphenol                                  |  |
| 11  | Butylated hydroxytoluene                       |  |
| 12  | 1-(4-Hydroxy-3,5-dimethoxyphenyl) propan-1-one |  |



**Table S2.** Yields of various identified liquid products (C-based, mol %).

| NO. | Compounds                                      | SZ    | Pt/SZ | La <sub>2</sub> O <sub>3</sub> /SZ | PtLa1/SZ | PtLa3/SZ | PtLa6/SZ |
|-----|------------------------------------------------|-------|-------|------------------------------------|----------|----------|----------|
| 1   | Furfuryl alcohol                               | 3.44  | 4.50  | 4.07                               | 7.50     | 6.46     | 5.96     |
| 2   | Benzaldehyde                                   | 1.40  | 2.44  | 2.64                               | 2.39     | 4.50     | 3.37     |
| 8   | 2,6-Dimethylstyrene                            | 1.03  | 1.06  | 1.26                               | 1.24     | 1.58     | 1.18     |
|     | <i>Y<sub>np</sub></i>                          | 5.87  | 8.00  | 7.98                               | 11.10    | 12.50    | 10.50    |
| 3   | 2,6-Xylenol                                    | 0.193 | 1.06  | 1.21                               | 1.08     | 1.12     | 0.59     |
| 4   | 4-Vinylphenol                                  | 5.49  | 9.43  | 9.91                               | 8.09     | 13.67    | 9.28     |
| 5   | Iso-creosol                                    | 0.38  | 0.45  | 0.415                              | 0.42     | 0.42     | 0.17     |
| 6   | 6-Methylsalicylic acid ethyl ester             | 0.87  | 0.66  | 0.361                              | 0.24     | 0.20     | 0.33     |
| 7   | 4-Hydroxyphenylacetic acid                     | 3.48  | 3.59  | 4.87                               | 3.72     | 5.02     | 5.32     |
| 9   | 1,5-Dihydroxy-1,2,3,4-tetrahydro naphthalene   | 2.08  | 2.69  | 3.10                               | 3.58     | 1.58     | 2.73     |
| 10  | 2,2'-Biphenol                                  | 0.73  | 1.04  | 2.77                               | 2.30     | 2.45     | 2.26     |
| 11  | Butylated hydroxytoluene                       | 0.15  | 1.21  | 1.25                               | 1.17     | 4.05     | 1.31     |
| 12  | 1-(4-Hydroxy-3,5-dimethoxyphenyl) propan-1-one | 0.00  | 0.16  | 0.26                               | 0.65     | 1.25     | 0.68     |
|     | <i>Y<sub>p</sub></i>                           | 13.4  | 18.7  | 24.1                               | 21.2     | 28.7     | 22.7     |
|     | <i>Y<sub>np</sub>+Y<sub>p</sub></i>            | 19.3  | 26.7  | 32.1                               | 32.3     | 41.2     | 33.2     |
|     | <i>Y<sub>c</sub></i>                           | 30.6  | 44.9  | 47.8                               | 58.4     | 63.9     | 52.1     |

*Y<sub>c</sub>*, total yields of carbon-based products; *Y<sub>p</sub>*, yields of phenolic compounds; *Y<sub>np</sub>*, yields of nonphenolic compounds.
